# Supplementary material for: Species-specific host factors rather than virus-intrinsic virulence determine primate lentiviral pathogenicity
Source: Nat Commun. 2018 Apr 10;9:1371. doi: 10.1038/s41467-018-03762-3 (PMC5893559; doi:10.1038/s41467-018-03762-3)
Supplement: Supplementary file 1 — Supplementary Information(PDF 2325 kb) [file 41467_2018_3762_MOESM1_ESM.pdf]

## **SUPPLEMENTARY INFORMATION**

### **Species-specific host factors rather than virus-intrinsic virulence determine primate lentiviral pathogenicity**

Simone Joas,<sup>1</sup> Erica H. Parrish,<sup>2§</sup> Clement W. Gnanadurai,<sup>1#</sup> Edina Lump,<sup>1</sup> Christina M. Stürzel,<sup>1</sup>  
Nicholas F. Parrish,<sup>2%</sup> Gerald H. Learn,<sup>2</sup> Ulrike Sauermann,<sup>3</sup> Berit Neumann,<sup>3</sup> Kerstin Mätz  
Rensing,<sup>3</sup> Dietmar Fuchs,<sup>4</sup> James M. Billingsley,<sup>5</sup> Steven E. Bosinger,<sup>5</sup> Guido Silvestri,<sup>5</sup> Cristian  
Apetrei,<sup>6</sup> Nicolas Huot,<sup>7,8</sup> Thalia Garcia-Tellez,<sup>7</sup> Michaela Müller-Trutwin,<sup>7</sup> Dominik Hotter,<sup>1</sup>  
Daniel Sauter,<sup>1</sup> Christiane Stahl-Hennig,<sup>3</sup> Beatrice H. Hahn,<sup>2</sup> and Frank Kirchhoff<sup>1\*</sup>

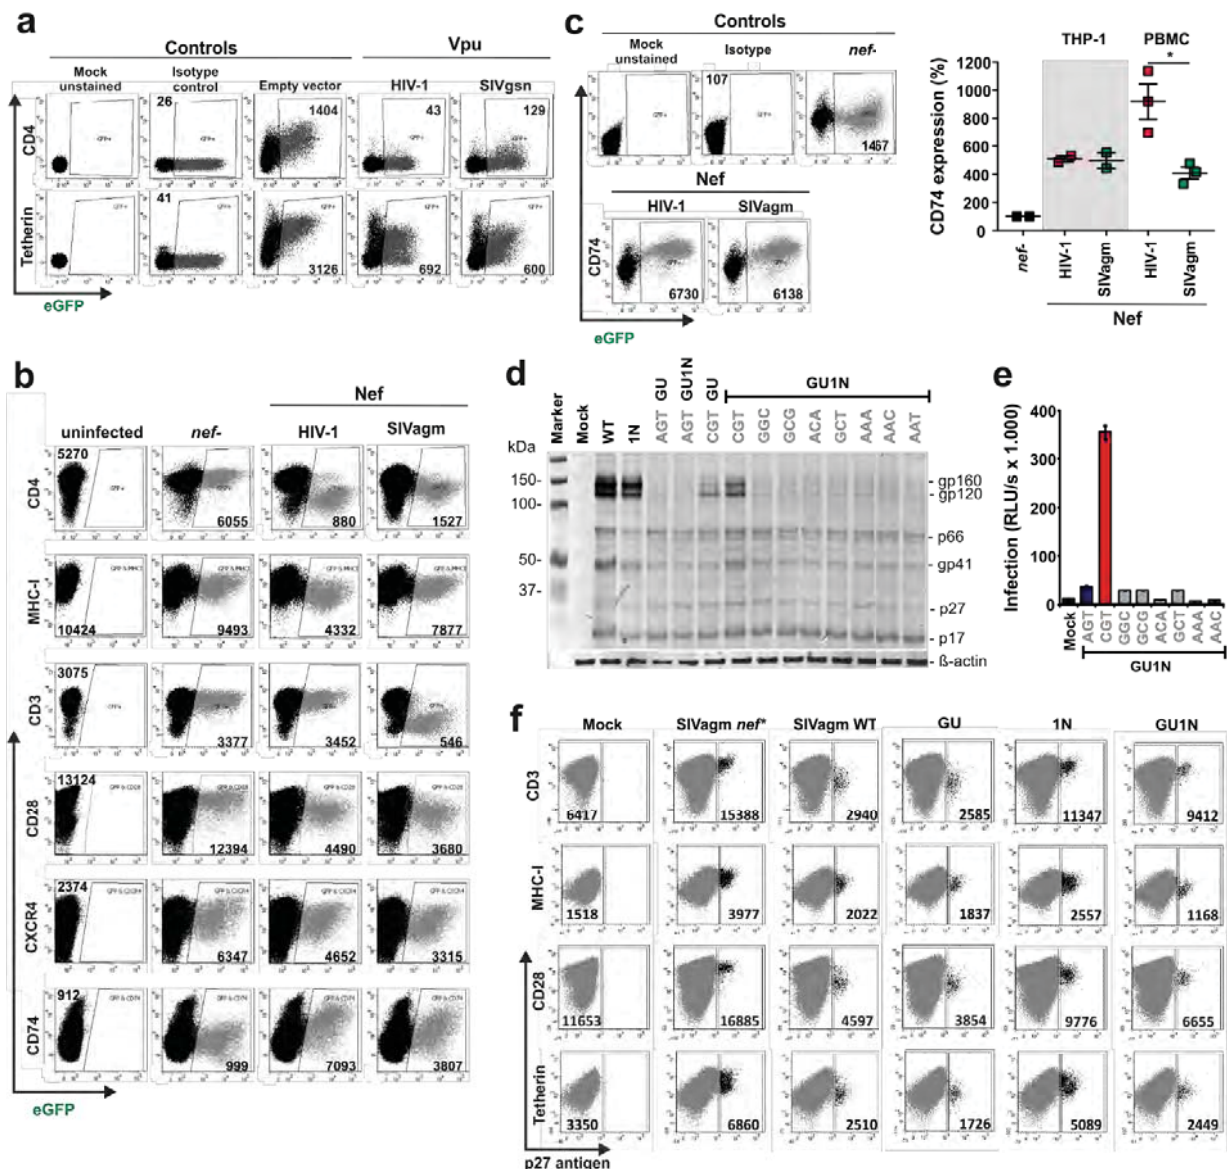

**Supplementary Figure 1. Functional characterization and SIVagm proviral expression of the SIVgsn Vpu and HIV-1 NA7 Nef proteins.** (a) Modulation of CD4 and AGM tetherin by HIV-1 WITO and SIVgsn71 Vpu. FACS analysis of HEK293T cells cotransfected with CD4 or AGM tetherin expression vectors and pCG plasmids expressing eGFP alone or together with the indicated *vpu* allele. (b) Human PBMCs or CD4<sup>+</sup> T cells were stimulated with CD3/CD28 beads for three days, transduced with VSV-G pseudotyped *vpu*- and *env*-defective HIV-1 NL4-3 IRES eGFP constructs containing the indicated *nef* alleles and examined by flow cytometric analysis 2 days later. (c) Upmodulation of CD74 cell surface expression by HIV-1 NA7 and SIVagm Sab Nef proteins. THP-1 cells or human PBMCs were transduced and analyzed by flow cytometry for CD74 expression as described in panel b. Each symbol represents the result obtained in one independent experiment. (d) Western blot analysis of cellular extracts of HEK293T cells transfected with the indicated mutant SIVagm *vpu* Kozak variants. (e) Infectious virus production by HEK293T cells transfected with the indicated SIVagm GU1N constructs. Shown are average values ( $\pm$ SEM) of triplicate infections. (f) Modulation of CD3, MHC-I, CD28 and AGM tetherin in AGM PBMCs. The cells were stimulated with PHA for three days and then spininfected with the different SIVagm IMC. Surface expression by flow cytometric analysis was performed 2 days later.

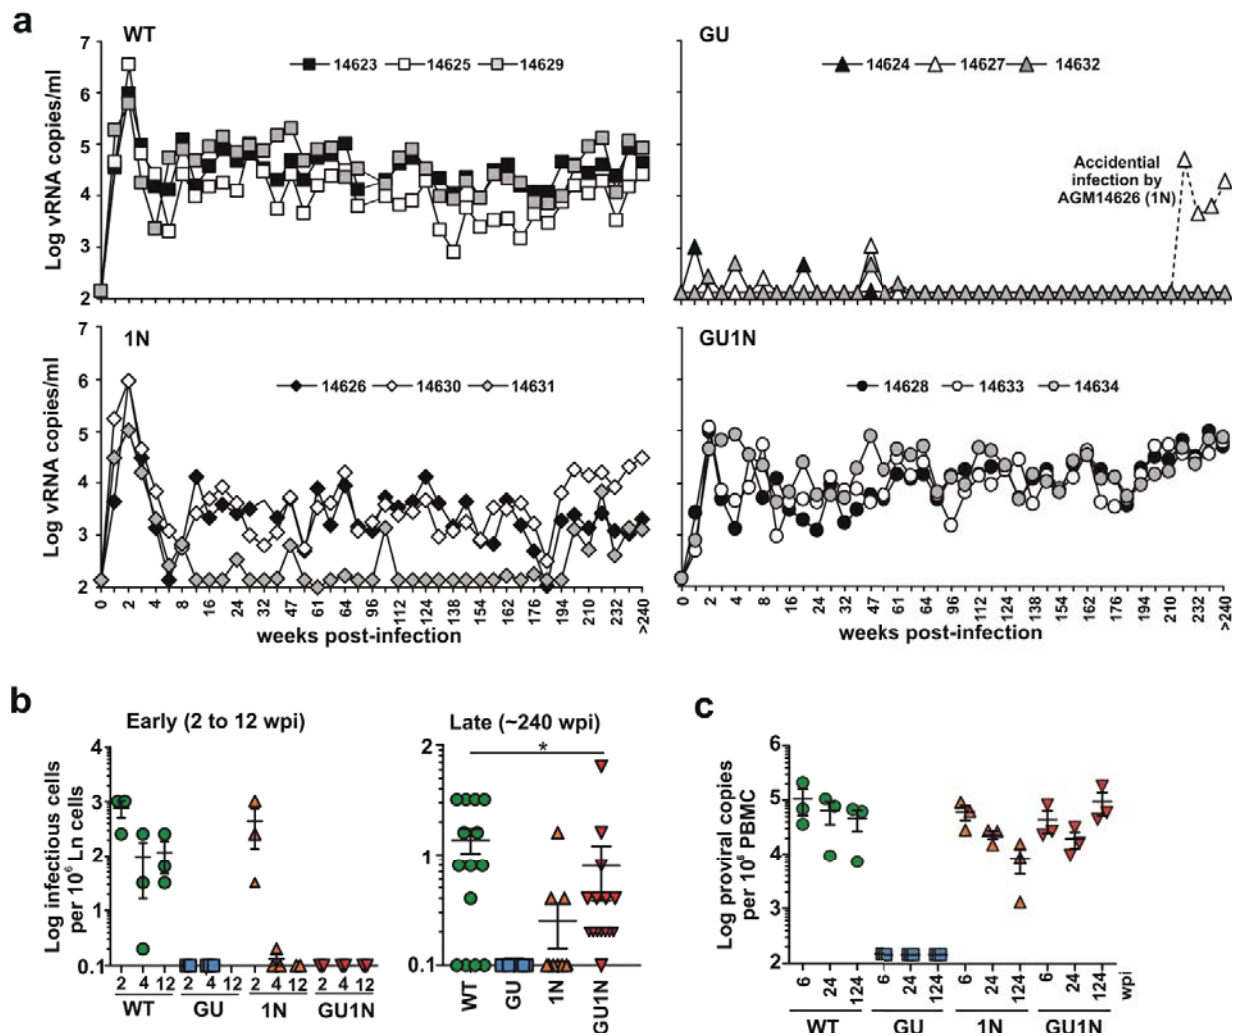

**Supplementary Figure 2. Replication of chimeric SIVagm constructs *in vivo*.** (a) Viral RNA copy numbers in AGMs infected with the four SIVagm constructs. (b) Cell-associated viral loads in lymph nodes (Ln) at the indicated time points. 12 wpi was not determined for the GU group (c) Proviral copy numbers in blood-derived PBMCs at later time points (>170 wpi). Panel b and c show the mean  $\pm$  SEM.

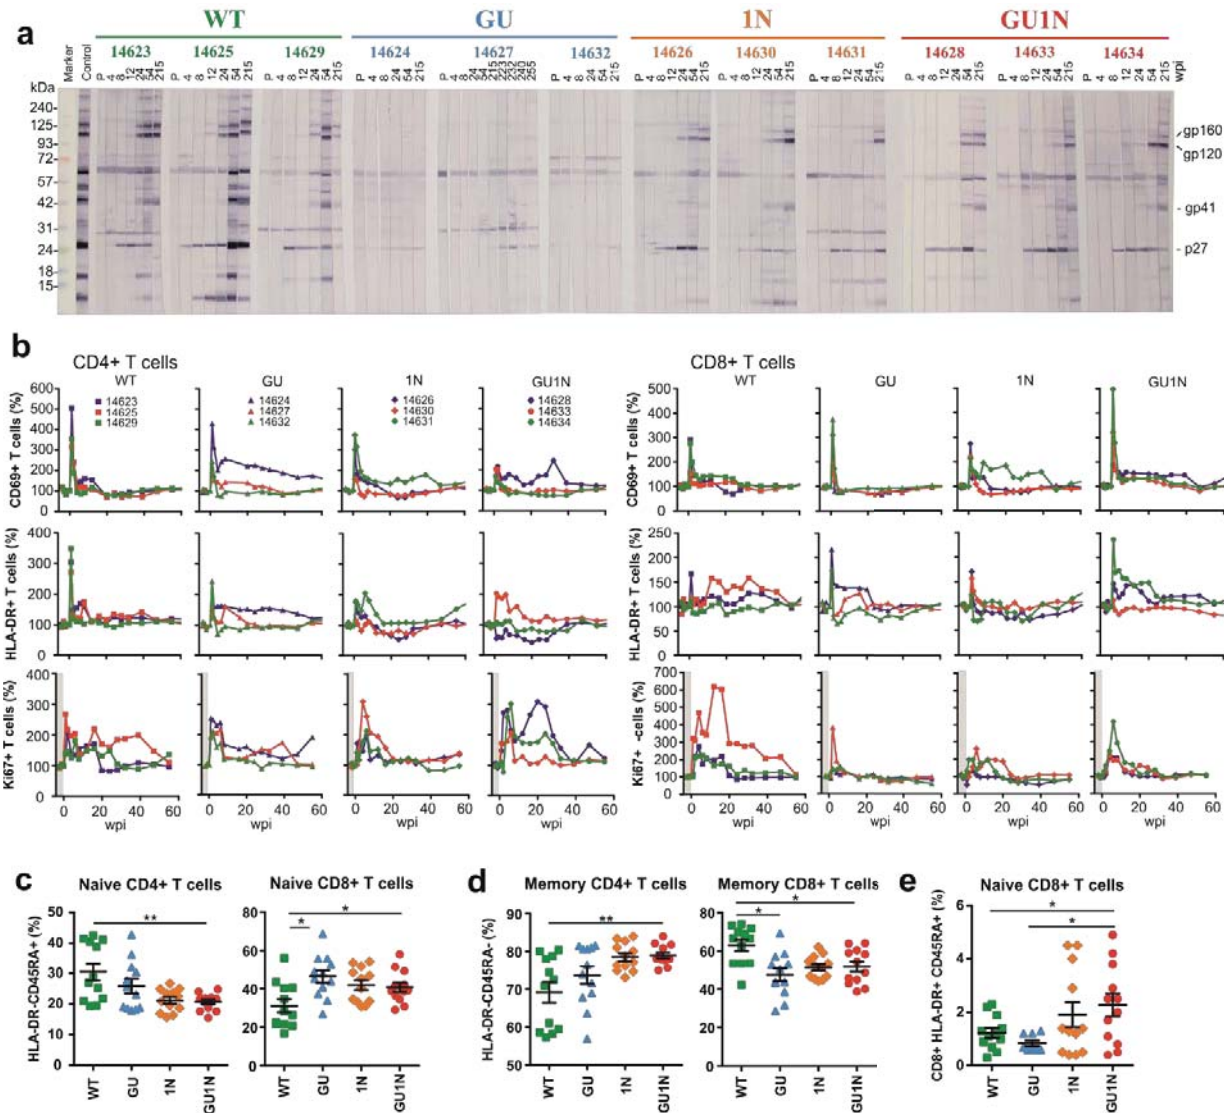

**Supplementary Figure 3. Humoral immune response and cellular activation in WT and chimeric SIVagm infection.** (a) Humoral immune response to SIVagm as determined by Western immunoblot. Viral proteins were separated by SDS-PAGE, transferred to a nitrocellulose membrane, and subjected to immunoblot with sera obtained from the infected AGMs at the indicated weeks post-infection (wpi). P, preserum; gp, glycoprotein. (b) Changes in the numbers of activated (CD69+ and HLA-DR+) and proliferating (Ki67+) CD4+ and CD8+ T cells compared to the average numbers detected prior to infection (100%). (c-e) Frequencies of (c) naïve, (c) memory and (e) activated naïve T cell subsets at later time points ( $\geq 170$  wpi). Shown are individual data points with the mean  $\pm$  SEM.

Figure S4a

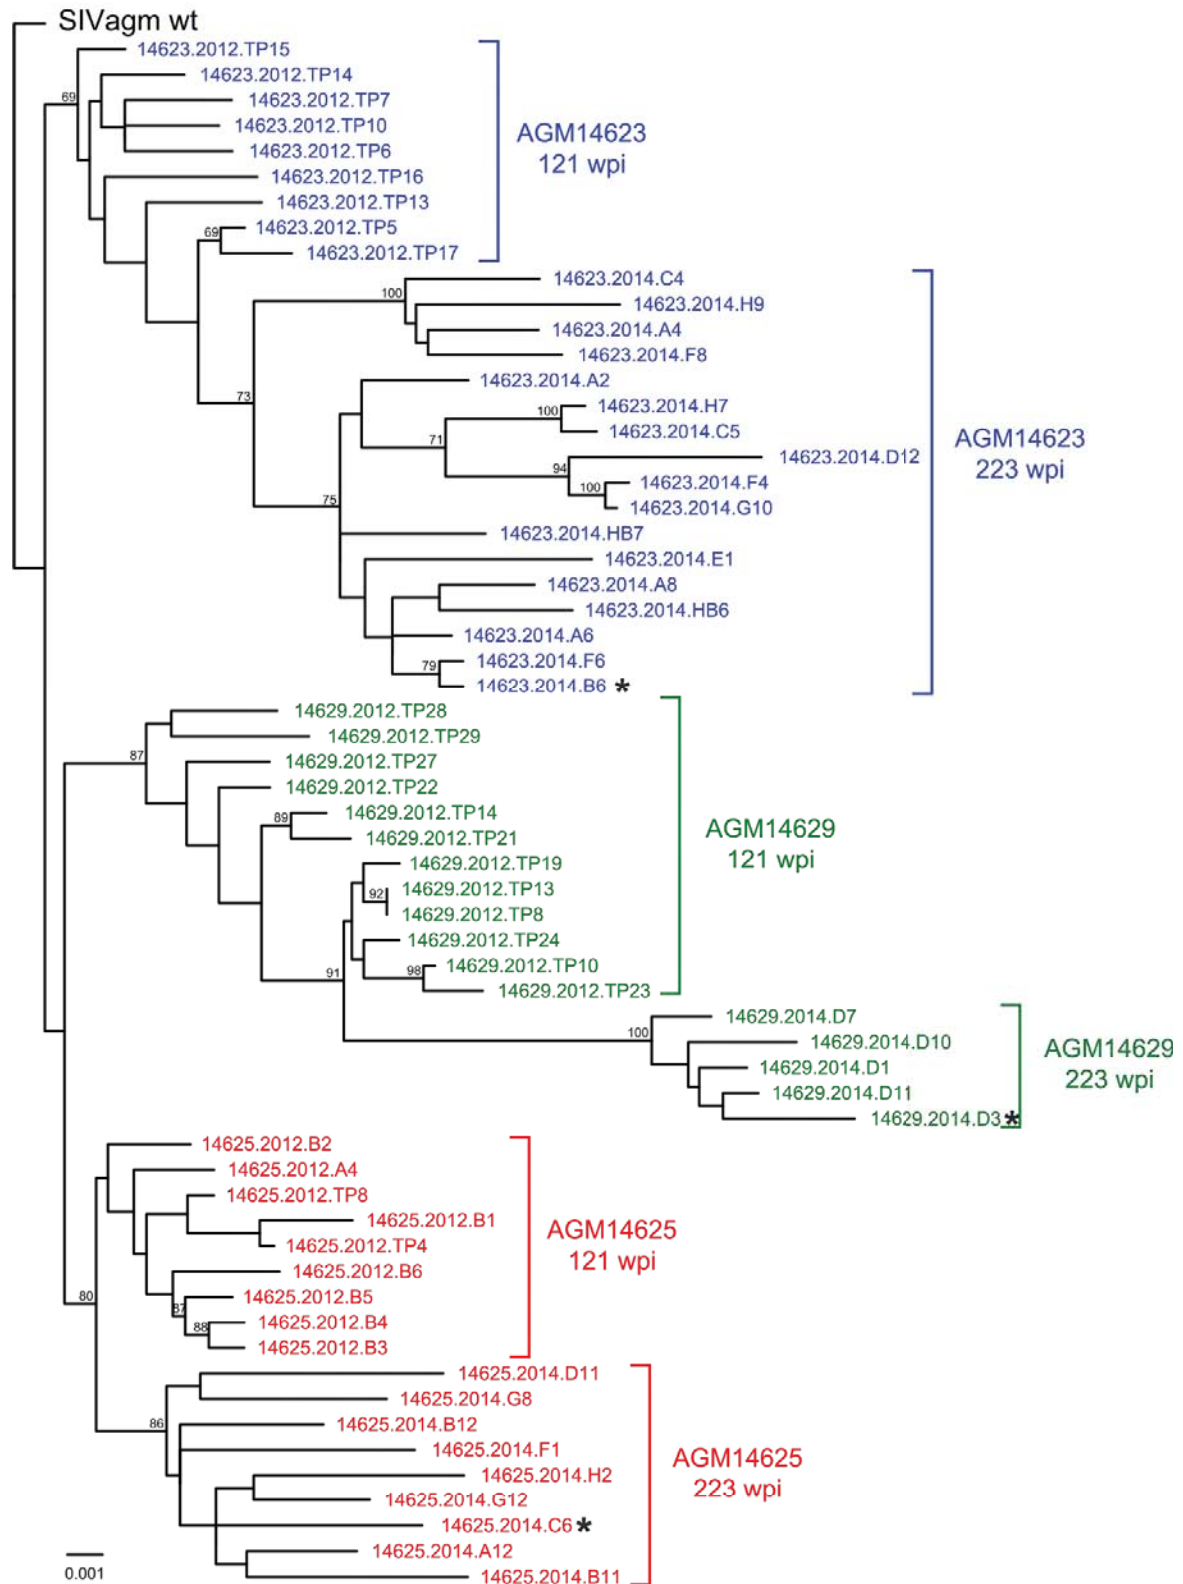

**Figure S4b**

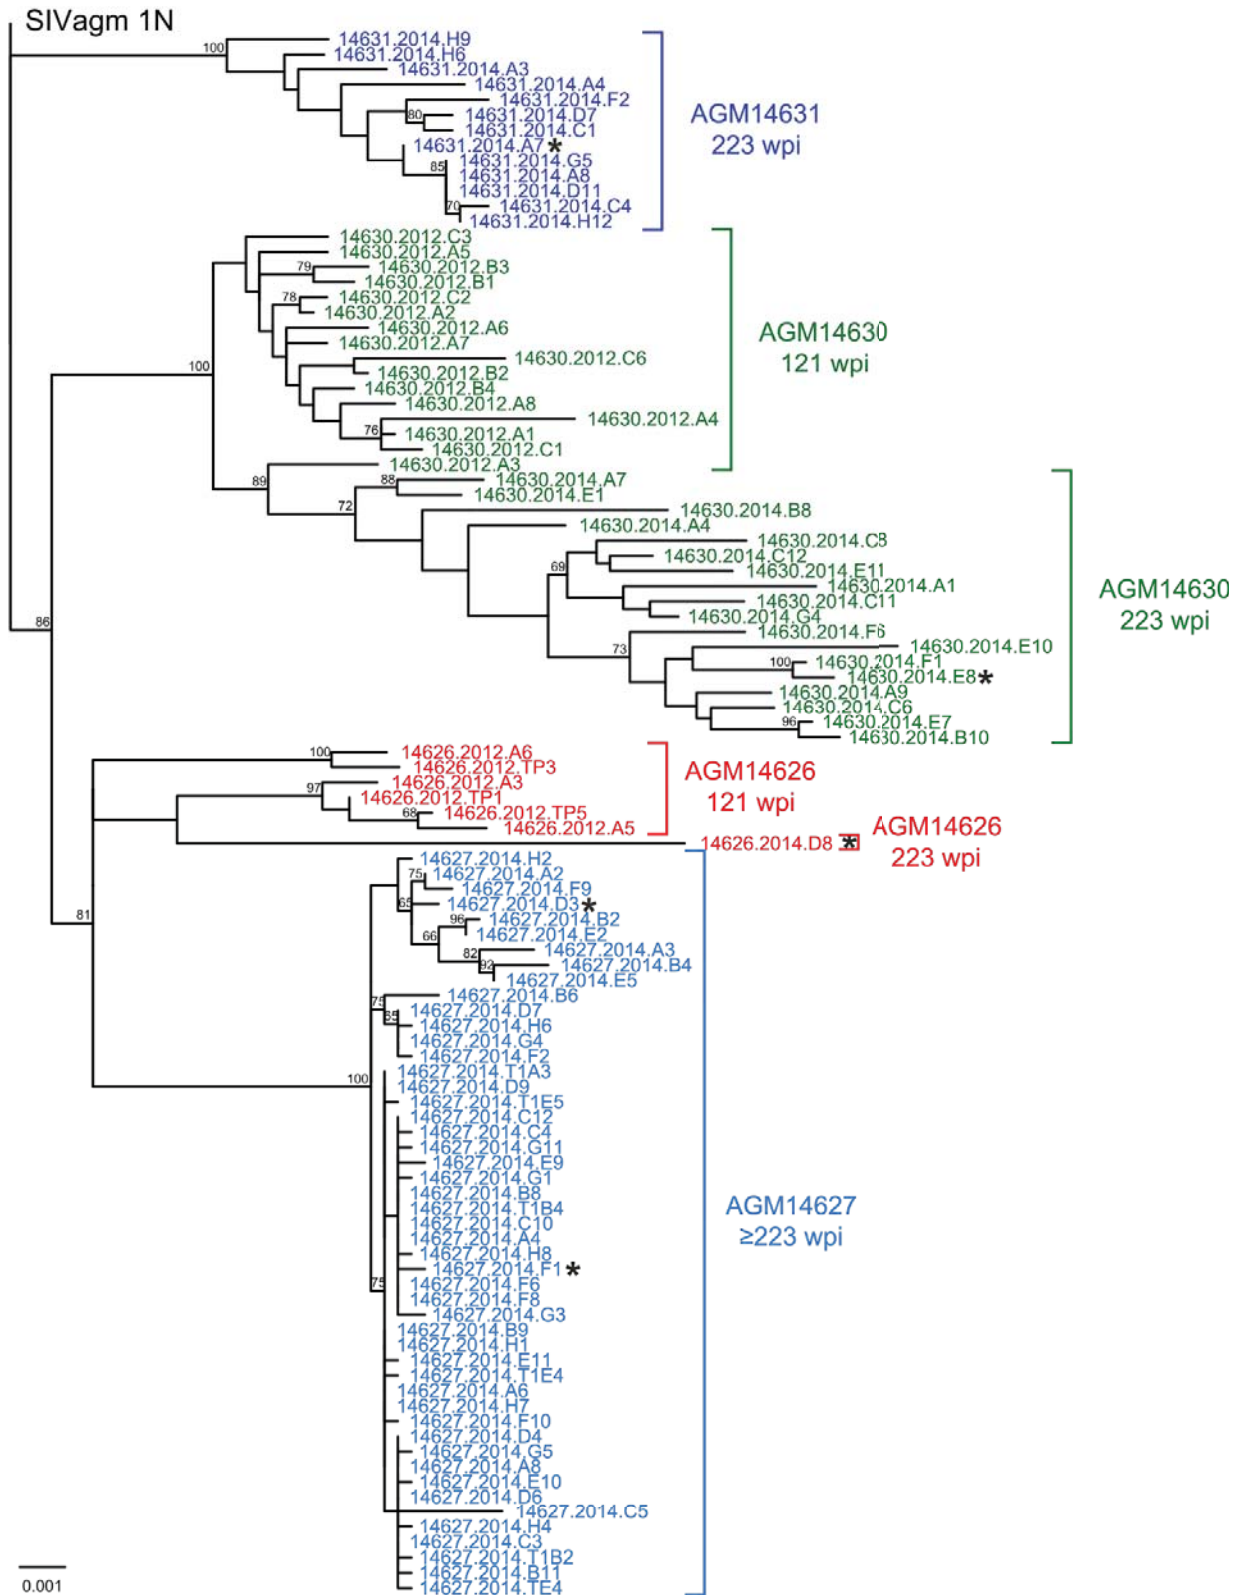

**Figure S4c**

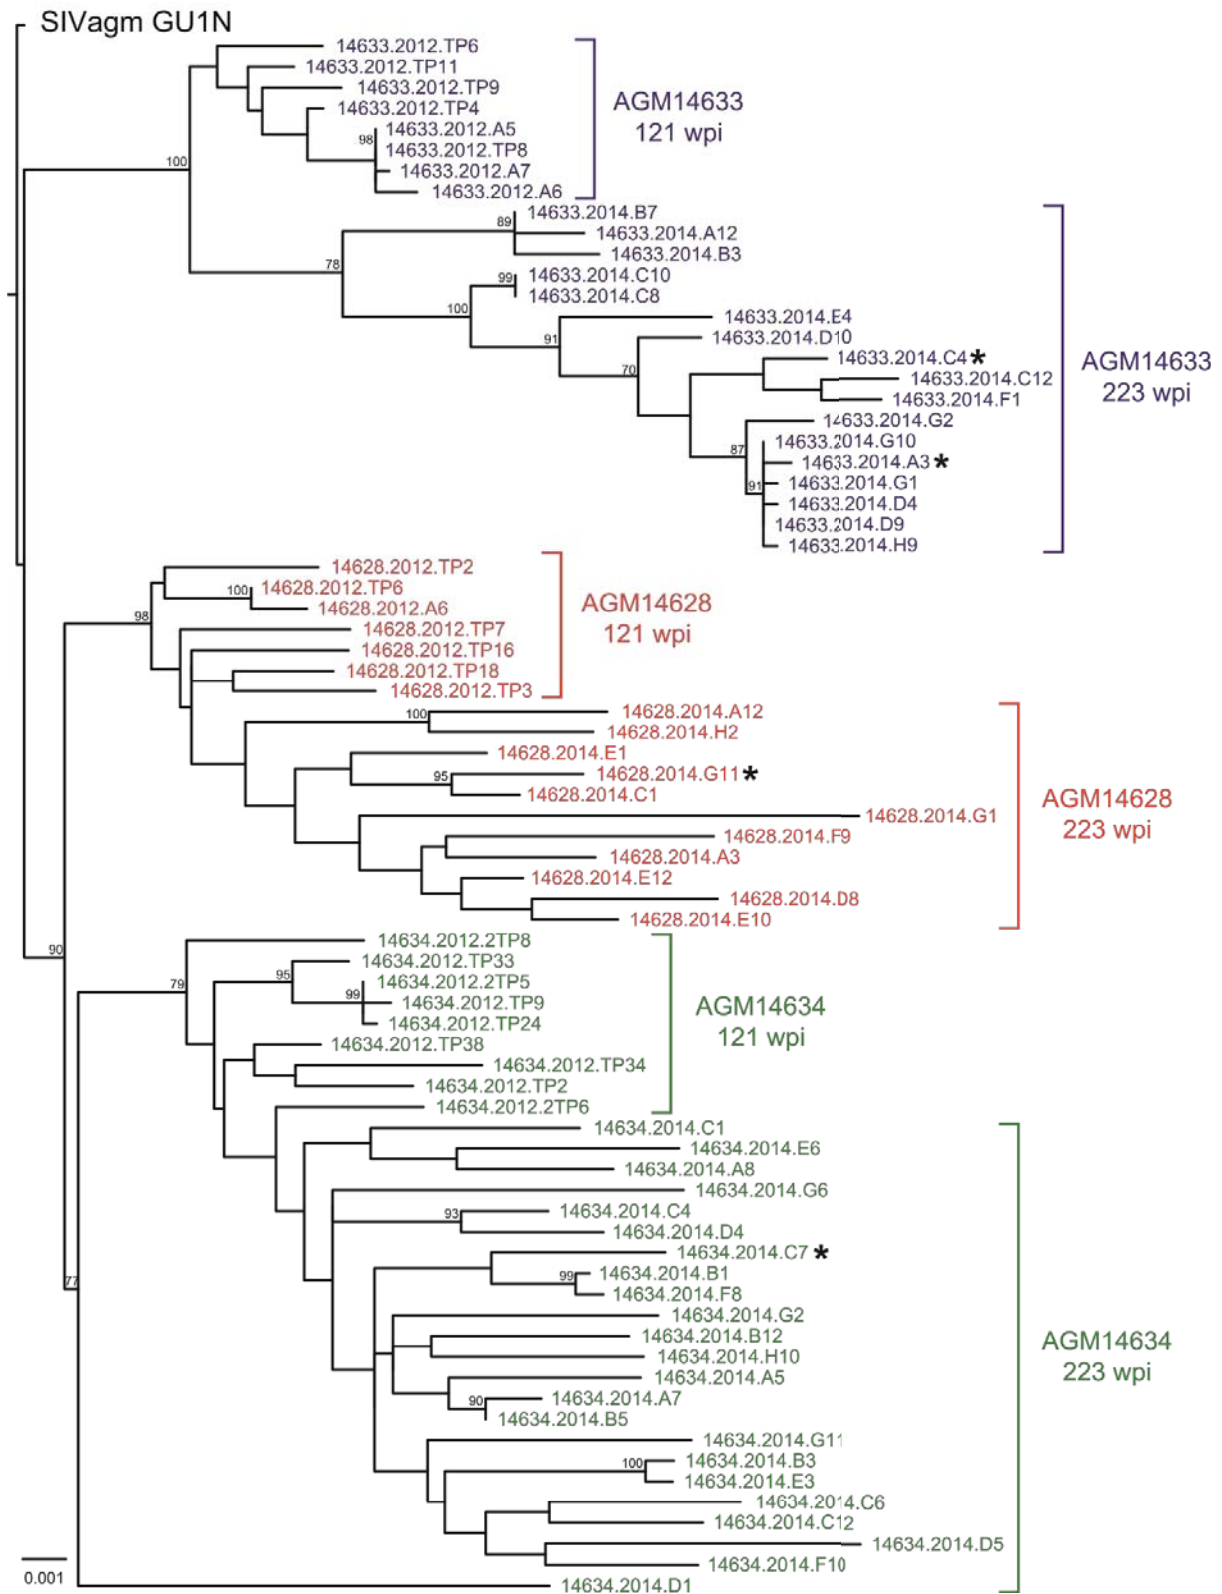

**a**

Myristoylation

1

Acidic PACS

PxxPxxP

PAK 130

SIVagmSab WT MGGNSKKQQQ QRSILWMSKL REAPEIRYDM LSDPLIQGSS SIQEKCAKSL SDGLIKQGDS SRTEGIKRL HPGKQPSWYD DDEEEVGFFV RFGVPLRVMT YKLAVDLSHF LKEKGGLGEG YYSRRKKIL

14623 3/9

14623 2/9

14623 1/9

14623 1/9

14623 1/9

14623 1/9

14625 3/9

14625 2/9

14625 1/9

14625 1/9

14625 1/9

14625 1/9

14629 4/12

14629 3/12

14629 1/12

14629 1/12

14629 1/12

14629 1/12

14629 1/12

14629 1/12

131

APs ExxxLL

226

SIVagmSab WT DLYALNEWGI VDGWNYTGD RGTRYPKTFG FCFKLVPVHP SDEAGNDEHH CLHHPMQVAV EDDPWKEILV WKFPDPLAVD YAAWRLHPEQ VFTSTA

14623 2/9

14623 1/9

14623 1/9

14623 1/9

14623 1/9

14623 1/9

14625 3/9

14625 2/9

14625 1/9

14625 1/9

14625 1/9

14625 1/9

14629 4/12

14629 3/12

14629 1/12

14629 1/12

14629 1/12

14629 1/12

14629 1/12

14629 1/12

**b**

→HIV-1 Nef

CD4

Acidic PACS

PxxPxxP SH-3

140

AqmCON-INAT MGGNSKKQQQ QRSILWMSKL REAPEIRYDM LSDPLIQGSS SIQEKCAKSL SDGLIKMGCK WKRSAGGWS AVRRKMEQAE PAADGVGAVS RDLEKYGAIT SSNTATNADG CAWLEAQEER EVGFPPVPRVQ PLRDMYKAA

14634.2012.TP2

14634.2012.TP34

14634.2012.TP38

14634.2012.TP39

14634.2012.TP24

14634.2012.TP9

14634.2012.TP33

14634.2012.TP25

14634.2012.TP28

SIVagmSAB2018

141

PAK

Thioost.

APs ExxxLL

V1H

264

GUIN VDISHFLLKK GGLGLSHSQ RRDILDIMI YHTGGFFPW QNTTGGIR YPLTFWCKFK LVPVRAQVE RANTGENSL DHPMSLHMG DAEREVLQWK PDRSLAFHNM ARELNPEYK DC

14634.2012.TP2

14634.2012.TP34

14634.2012.TP38

14634.2012.TP39

14634.2012.TP24

14634.2012.TP9

14634.2012.TP33

14634.2012.TP25

14634.2012.TP28

SIVagmSAB2018

L IYY E KK YA LNEW IVDG .D. T K F HPSED .ND HHC OVAMED PAK I.V .PL VDYA VR .OV STSA

8

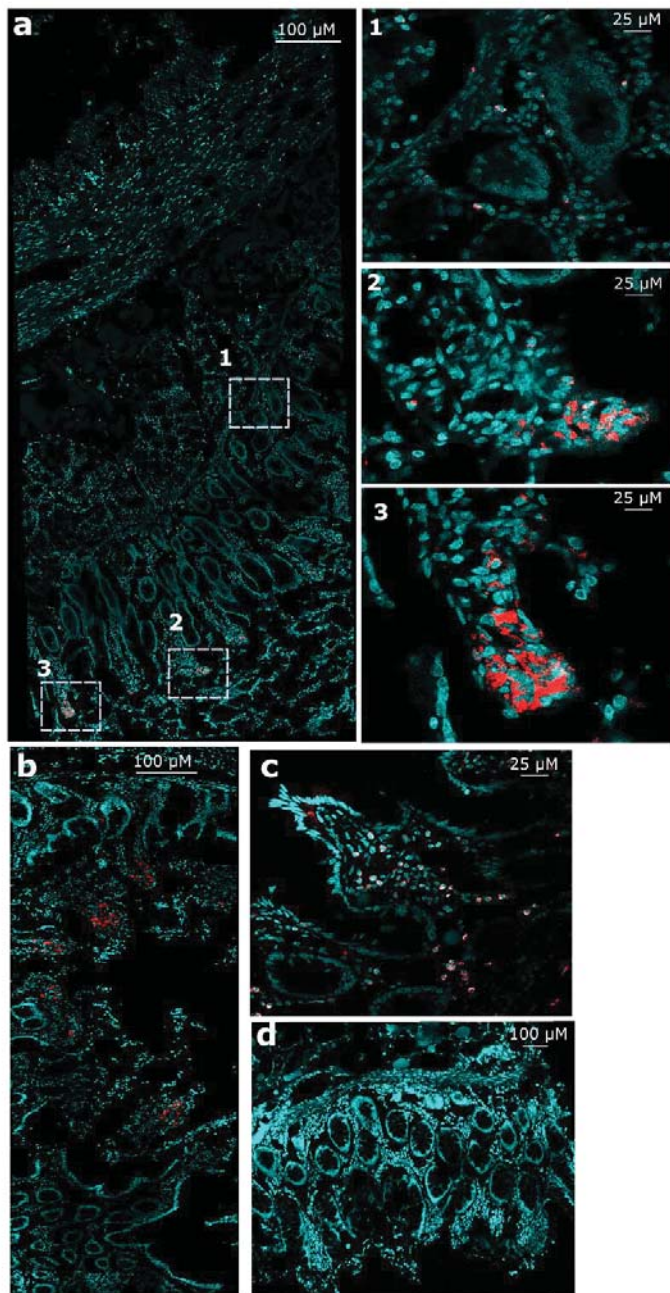

**Supplementary Figure 6. Distribution of SIVagm GU in gut during the chronic phase of infection.** Confocal images of SIV-infected cells (red), nucleus (blue) in duodenum (a) , ileum (b) and jejunum (c) are shown. Representative SIV-specific in situ hybridization during chronic infection, demonstrating productively infected cells in duodenum, ileum and jejunum. The enlargements display representative examples of the shape of the SIV RNA positive cells. Duodenum sections from an uninfected monkey were used as control to demonstrate the specificity of the SIV probes. Pictures were obtained using a Leica SP8 confocal microscope and processed with ImageJ software.

**Figure 4b**

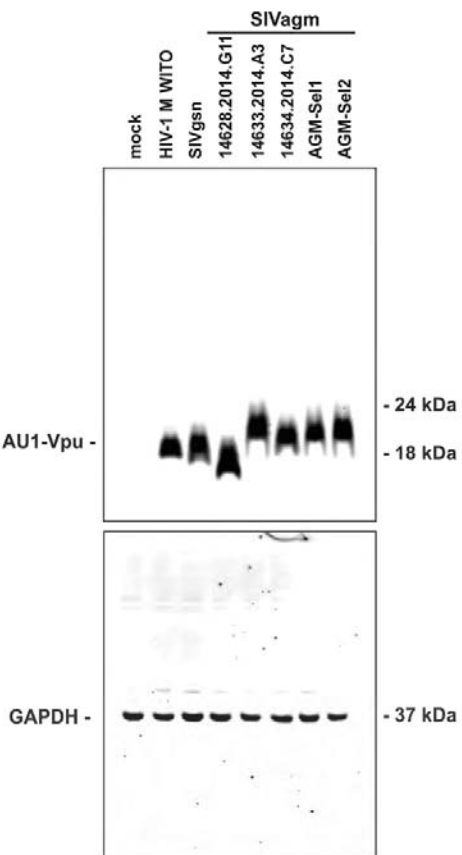

**Figure 5b**

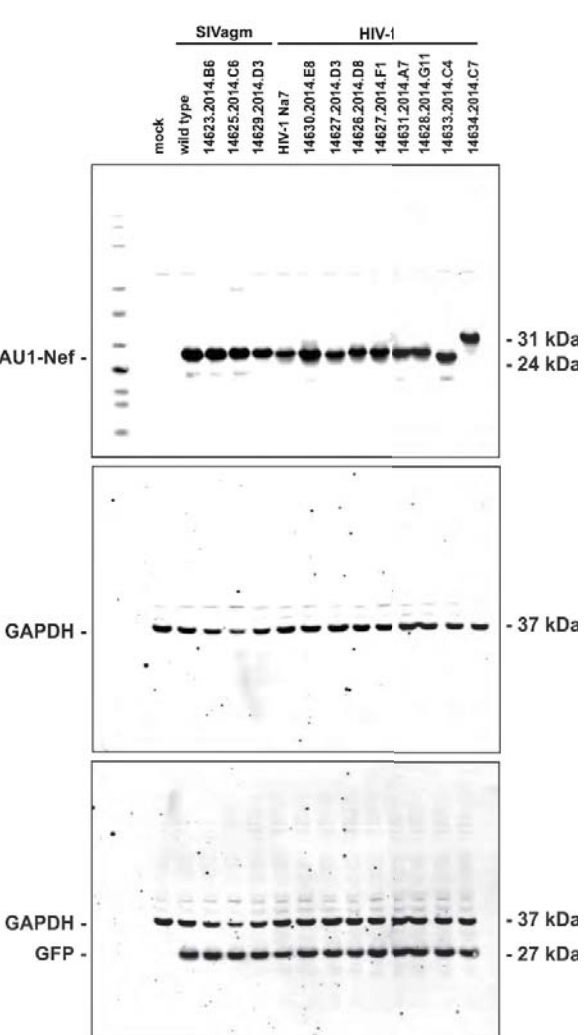

**Supplementary Figure 7. Uncropped scans of the Western blots shown in the indicated figures.**
